# Supplementary material
Source: Springer Nature journal article supplement (https://www.springermedizin.de/resource/supplementary/13054_2013_2431_MOESM1_ESM.pdf/9714000)
Supplement: MOESM1 [file 9714000]

**50**  
patients undergoing  
hemodialysis  
for fluid overload

**19**  
patients excluded

**31**  
patients included  
(31 hemodialysis  
sessions)

**10**  
ultrafiltration  
estimated <5% BW

**6**  
diuretics  
or persistent diuresis

**3**  
amputated limb  
or BMI >40 kg/m<sup>2</sup>
